# Supplementary material
Source: publisher figshare collection journal article supplement (https://tandf.figshare.com/ndownloader/files/13164755)
Supplement: Supplementary file 1 [file 13164755]

**Supplementary Table S1 - Quality evaluation result of the studies according to the Newcastle-Ottawa Scale.**

| Study | Selection | | | |  | Comparability |  | Exposure | | | Summation |
| --- | --- | --- | --- | --- | --- | --- | --- | --- | --- | --- | --- |
| Item1 | Item2 | Item3 | Item4 |  | Item1 |  | Item1 | Item2 | Item3 |
| Wang et al. | ***√*** | ***√*** |  | ***√*** |  | ***√√*** |  | ***√*** | ***√*** | ***√*** | Eight Stars |
| Yamada et al. | ***√*** | ***√*** | ***√*** | ***√*** |  | ***√*** |  | ***√*** | ***√*** | ***√*** | Eight Stars |
| Liang et al. | ***√*** | ***√*** |  | ***√*** |  | ***√√*** |  | ***√*** | ***√*** | ***√*** | Eight Stars |
| Infante-Rivard et al. | ***√*** | ***√*** |  | ***√*** |  | ***√√*** |  | ***√*** | ***√*** | ***√*** | Eight Stars |
| Delpisheh et al. | ***√*** | ***√*** |  | ***√*** |  | ***√*** |  | ***√*** | ***√*** | ***√*** | Seven Stars |
| Grazuleviciene et al. | ***√*** | ***√*** | ***√*** | ***√*** |  | ***√*** |  | ***√*** | ***√*** | ***√*** | Eight Stars |
| Li et al. | ***√*** |  |  | ***√*** |  | ***√*** |  | ***√*** | ***√*** | ***√*** | Six Stars |
| Fu et al. | ***√*** | ***√*** |  | ***√*** |  | ***√*** |  | ***√*** | ***√*** | ***√*** | Seven Stars |
| He et al. | ***√*** | ***√*** |  | ***√*** |  | ***√√*** |  | ***√*** | ***√*** | ***√*** | Eight Stars |
| Bustamante et al. | ***√*** | ***√*** | ***√*** | ***√*** |  | ***√√*** |  | ***√*** | ***√*** | ***√*** | Nine Stars |
| Danileviciute et al. | ***√*** | ***√*** | ***√*** | ***√*** |  | ***√*** |  | ***√*** | ***√*** | ***√*** | Eight Stars |
| Sharma et al. | ***√*** | ***√*** |  | ***√*** |  | ***√*** |  | ***√*** | ***√*** | ***√*** | Seven Stars |
| Chen et al. | ***√*** | ***√*** | ***√*** | ***√*** |  | ***√√*** |  | ***√*** | ***√*** | ***√*** | Nine Stars |
| Chandra et al. | ***√*** | ***√*** |  | ***√*** |  | ***√√*** |  | ***√*** | ***√*** | ***√*** | Eight Stars |
| Xie et al. | ***√*** | ***√*** |  | ***√*** |  | ***√√*** |  | ***√*** | ***√*** | ***√*** | Eight Stars |
| Ding et al. | ***√*** | ***√*** |  | ***√*** |  | ***√*** |  | ***√*** | ***√*** | ***√*** | Seven Stars |
| Levallois et al. | ***√*** | ***√*** | ***√*** | ***√*** |  | ***√√*** |  | ***√*** | ***√*** | ***√*** | Nine Stars |
| Huang et al. | ***√*** | ***√*** | ***√*** | ***√*** |  |  |  | ***√*** | ***√*** | ***√*** | Seven Stars |
